1 **Investigating the spatial accessibility and coverage of the pediatric COVID-19 vaccine: an ecologic study of**  
2 **regional health data**

3 Amin Bemanian MD PhD<sup>1-3</sup> and Jonathan F Mosser MD<sup>1-3</sup>

4  
5 Affiliations:

- 6 1. Department of Pediatrics, University of Washington, Seattle, WA
- 7 2. Seattle Children's Hospital, Seattle, WA
- 8 3. Institute for Health Metrics and Evaluation, Seattle, WA

9  
10 Corresponding Author: Amin Bemanian

11 Email: [bemanian@uw.edu](mailto:bemanian@uw.edu)

12 Address: Seattle Children's Hospital, MA.7.222, 4800 Sand Point Way NE, Seattle, WA 98115

13  
14 **Abstract**

15  
16 **Background**

17 The COVID-19 pandemic presented healthcare workers and public health agency a unique challenge of having to  
18 rapidly deliver a novel set of vaccines during a public health crisis. For pediatric patients, there was an additional  
19 layer of complexity given the delayed timeline to deliver these vaccines and the differences in dosing and available  
20 products depending on the age of those receiving the vaccine. This paper investigates the spatial accessibility and  
21 uptake of the COVID-19 vaccine in King County, WA, USA.

22  
23 **Methods**

24 Public data for COVID-19 vaccine sites to calculate spatial accessibility using an enhanced two step floating  
25 catchment area (E2SFCA) technique. Spatial regression analyses were done looking at the relationship between  
26 spatial accessibility and ZIP code level vaccination rates. Relationships with other socioeconomic and demographic  
27 variables were calculated as well.

28  
29 **Findings**

30 Higher rates of vaccine accessibility and vaccine coverage were found in adolescent (12 to 17-year-old) individuals  
31 relative to school age (5 to 11-year-old) individuals. Vaccine accessibility was positively associated with coverage  
32 in both age groups in the univariable analysis. This relationship was affected by neighborhood educational  
33 attainment.

34  
35 **Interpretation**

36 This paper successfully demonstrates how spatial accessibility measures such as E2SFCA can be used to assess the  
37 availability of the COVID-19 vaccine in a region such as a metropolitan area or county. It also provides insight into  
38 some of the ecological factors that affect COVID-19 vaccination rates. Implementation of these technique could  
39 help public health authorities and healthcare organization plan future vaccination efforts.

40  
41 **Word Count (main text): 3229**

42 **Word Count (abstract): 243**

43

## 44 **Introduction**

45 Spatial accessibility to healthcare services is an important determinant of health, as it can affect a patient's ability to  
46 receive preventative services, medications, and acute or critical care.

47 Within the field of pediatric medicine, there have been multiple studies showing how providers and other healthcare  
48 services are not evenly distributed across populations, with disparities across socioeconomic status, racial  
49 composition, and urban/rural areas.<sup>1,3,4</sup> These differences in spatial accessibility have been shown to affect health  
50 outcomes as well. One study of routine immunizations among children with Medicaid insurance in Washington DC  
51 found that higher spatial accessibility to vaccination providers was associated with higher odds of routine  
52 vaccination completion.<sup>5</sup> Spatial availability has been shown to affect the distribution of childhood vaccine doses as  
53 well. Mapping of human papillomavirus and tetanus/diphtheria/pertussis vaccine doses in Georgia was found to  
54 have spatial clustering at the county level, and the authors found that public transit and the number of health  
55 department clinics were positively associated with increased vaccine doses.<sup>6</sup> These studies demonstrate the  
56 importance of spatial accessibility in pediatric health.

57 Ensuring accessibility of care during a pandemic, however, is particularly difficult. The COVID-19 pandemic  
58 caused significant strain to the United States medical system and changes to patients' health seeking behaviors.  
59 Pediatric emergency department visits significantly decreased in 2020 relative to pre-pandemic levels and have  
60 slowly risen back over the course of 2021 and 2022.<sup>7</sup> Additional work has shown that emergency department visits  
61 and hospitalizations have disproportionately decreased among children living in census tracts with lower  
62 socioeconomic scores as measured by the Child Opportunity Index.<sup>8</sup> This decreased utilization has affected  
63 preventative care services as well, with routine childhood vaccinations across all age groups decreasing during the  
64 first year of the pandemic, especially dropping off during the initial months.<sup>9</sup> Furthermore, the COVID-19 pandemic  
65 has presented a unique challenge of deploying novel vaccines to curb disease spread, while much of society  
66 continued to try to isolate. For these reasons, investigation into the accessibility of pediatric COVID-19 vaccine  
67 deployment is relevant to understanding how healthcare resource access has been distributed across population areas  
68 and where the greatest needs are for vaccine providers and resources.

69 This paper seeks to characterize the spatial accessibility of pediatric COVID-19 vaccination sites in King County,  
70 Washington (WA) in the United States. Furthermore, it identifies associations neighborhood-level determinants of  
71 health and vaccine accessibility to assess if there are specific communities that have limited access to vaccine

72 providers. Finally, this study investigates the relationship between vaccine accessibility and coverage, specifically to  
73 test the hypothesis that increased accessibility is associated with higher rates of vaccine uptake within communities.

## 74 **Methods**

75 The 2019 5-year American Community Survey (ACS) was used for demographic and socioeconomic data via the  
76 tidycensus R package.<sup>10,11</sup> All variables were obtained at the ZIP Code Tabulation Area (ZCTA) level. Variables  
77 obtained from the ACS included age stratified population counts, the percentage of households living below the  
78 poverty line, the percentage of adults aged  $\geq 25$  years who graduated with a bachelor's degree or higher, and the  
79 percentage of residents belonging to specific racial/ethnic groups. COVID-19 vaccine coverage data was obtained  
80 from Public Health - Seattle and King County (PHSKC) COVID-19 Dashboard reflecting the latest Washington  
81 Immunization Information System data up to 7/5/2022.<sup>12</sup> Coverage was defined as the percentage of children who  
82 had completed a primary COVID-19 vaccination series (two doses of either the Pfizer-BioNTech BNT162b2 or  
83 Moderna mRNA-1273 mRNA vaccines). Vaccine coverage data was stratified by age into two groups: 5 to 11-year-  
84 olds (school age children) and 12 to 17-year-olds (adolescents). Data on younger children was not available at the  
85 time of this analysis.

86 Vaccine accessibility was estimated using the enhanced two-step floating catchment area (E2SFCA) technique.<sup>13</sup>  
87 Vaccine providers within King County were identified using the public Washington Vaccine Locator website and  
88 were stratified based on which vaccine series they provided: the adolescent/adult series ( $n = 434$ ) and/or the  
89 childhood series ( $n = 152$ ). Any site that was listed as a "mobile center" was excluded from the analysis, due to a  
90 lack of information on whether the address corresponded to where the center distributed the vaccine or where the  
91 vaccines were stored between drives.

92 The steps of the E2SFCA technique are briefly described here. First, for every ZCTA, 200 spatial points within the  
93 ZCTA's boundaries were randomly sampled, weighted based on a population density raster from WorldPop.<sup>14</sup> This  
94 sampling process aimed to reduce bias from picking a single point (e.g. geometric centroid) to represent each ZCTA,  
95 which could particularly affect large, sparsely populated ZCTAs. Next, travel time distances from each sampled  
96 point were calculated to each vaccination site using the R5R package and OpenStreetMap road network files.<sup>15</sup>  
97 Using these travel time distances, we then calculated the ZCTA's accessibility score for each of the sampled points.  
98 Two sets of scores based on private automobile and public transportation times were calculated and then weighted  
99 by the percentage of households who did not own any private automobiles (from the American Community Survey)

100 to calculate a combined score.<sup>10,11</sup> From this sample space, the median accessibility score for each ZCTA was  
101 selected. The derivation of the time weighting function for the E2SFCA is provided in supplement S1. One ZCTA  
102 encompassing Vashon Island, an island municipality within King County, was excluded from this analysis due to  
103 requiring a ferry to reach the mainland. As a result, it was a significant outlier for vaccine accessibility scores.  
104 Another ZCTA in the eastern part of the county was excluded as it crosses over into the neighboring Kittitas County.  
105 The relationship between accessibility and coverage was then assessed at the ZCTA level using spatial error  
106 regression with the spatialreg R package.<sup>16,17</sup> Ordinary linear regression was unable to be used given spatial  
107 autocorrelation in the residuals of most of the models. Analysis was stratified by the two age groups. First, we  
108 assessed if vaccine accessibility was associated with household poverty, racial composition, and adult educational  
109 attainment at the ZCTA level. We then investigated the relationship between accessibility and coverage with several  
110 models: a series of univariable regressions with accessibility and the socioeconomic/demographic variables, a  
111 multivariable regression with the socioeconomic/demographic variables added as covariates with no interaction  
112 terms, and a multivariate regression which included significant interactions with vaccine accessibility. Finally, we  
113 stratified a univariable regression analysis between accessibility and coverage based on ZCTA educational  
114 attainment. We selected a threshold of 50% for adults with bachelor's degrees (sample median: 52%) for the  
115 bifurcation. We conducted only univariable regressions for the stratified analysis, as the number of ZCTAs in each  
116 stratified model was low and multivariable analyses would be overfit.

## 117 **Results**

118 Descriptive summaries of the covariates of interest and vaccine accessibility and coverage are included in Table 1.  
119 Figure 1 shows the location of vaccination sites across King County for both school age and adolescent groups.  
120 There were nearly three times as many adolescent versus school age vaccination sites (434 vs 152). For both groups,  
121 most sites were clustered around Seattle (on the western side of the county) and the immediate neighboring suburbs.  
122 The eastern region of King County, WA is more mountainous and contains less dense, more spread-out  
123 communities. Notably, there were almost no school age vaccination sites listed in the Vaccine Locator for eastern  
124 King County, while there were a small number of adolescent sites. Vaccine accessibility is shown in figure 2. The  
125 interquartile range was 112.5 to 141.7 sites per 100,000 individuals for adolescents and 31.6 to 42.9 sites per  
126 100,000 individuals for school age children. The highest areas of accessibility were in southern Seattle and the  
127 nearby suburbs of Kent, Renton, and Mercer Island. Figure 3 shows vaccine coverage in the region. The interquartile

128 range for adolescents was 64.3% to 95% (the maximum reported value by the PHSKC website) and for school age  
129 children it was 35.2% to 69.3%. Again, coverage was highest in Seattle and its neighbors. However, compared to  
130 accessibility, the ZCTAs with the highest coverage were in northern Seattle and the suburbs of Bellevue, Kirkland,  
131 and Redmond.

132 There was a significant difference in vaccine accessibility between adolescents and school aged children across  
133 ZCTAs. There was a mean difference of 87.8 fewer vaccine sites per 100,000 children for school age children  
134 compared to adolescents ( $p < 0.001$ ). Similarly, there was a significant mean difference in vaccine coverage with  
135 school age children having 21.5% lower coverage than adolescents ( $p < 0.001$ ). Despite the differences in magnitude  
136 of vaccine accessibility and coverage between the two age groups, they were very strongly correlated to each other.

137 Accessibility was correlated across ages with an R of 0.901 and coverage was correlated with an R of 0.786.

138 Regression analyses to determine what covariates are associated with vaccine accessibility are shown in Table 2.

139 The relationships identified are the same across school age and adolescent vaccine accessibility. The percent of  
140 adults with a bachelor's or higher degree within a ZCTA and the percent of Asian residents were positively  
141 associated with the ZCTA's accessibility.

142 Regression analyses to evaluate associations with vaccine coverage are shown in Table 3. For both school age  
143 children and adolescents, vaccine accessibility was significantly associated with a higher percent of vaccinated  
144 children. However, this relationship was non-significant for school age children in the multivariate analyses. For  
145 adolescents, the multivariate analyses showed the effect of vaccine accessibility interacted significantly with  
146 educational attainment, with a positive relationship for both accessibility and educational attainment and negative  
147 effect for the interaction of the two variables. Therefore, adolescent vaccine coverage is predicted to increase with  
148 accessibility or educational attainment increase while the other remains low. However, when educational attainment  
149 is already high, accessibility was no longer predicted to cause a significant increase in coverage. Based on these  
150 results, we re-stratified the analysis on percent of adults with bachelor's degrees or higher, as shown in table 4.

151 Vaccine accessibility was only significantly associated with coverage among adolescents living in ZCTAs with <  
152 50% bachelor's degrees among adults and no relationship between accessibility and coverage in the  $\geq 50\%$   
153 bachelor's degrees ZCTAs.

154 For the other covariates, percentage of adults with a bachelor's or higher degree, percent of Asian residents, and  
155 percent of Hispanic residents were found to be significantly associated with increased vaccine coverage in both age

156 groups. Additionally, in the adolescent analysis, the percent of Native Hawaiian/Pacific Islander (NH/PI) was  
157 positively associated with coverage. However, both the Hispanic and NH/PI percentage effects had inconsistent  
158 effects when compared with the univariable models. NH/PI percentage did not have a significant effect, and  
159 Hispanic percentage had a statistically significant negative association. The percent of households whose income  
160 was below the poverty line and the percentage of American Indian/Alaska Native (AI/AN) residents were  
161 significantly negatively associated with coverage in both age groups in the univariable models, but they were only  
162 significantly associated in the school age group in the multivariable model.

### 163 **Discussion**

164 In this study we used the E2SFCA method to estimate pediatric COVID-19 vaccine accessibility in King County,  
165 WA and investigated differences in access and coverage across different age groups and other socioeconomic and  
166 demographic variables. At the time of writing of this article, there have been several papers recently published  
167 mapping COVID-19 vaccine accessibility, but none that have focused specifically on pediatric populations.<sup>18-20</sup> We  
168 showed that the areas of highest accessibility within King County were located in Seattle and the immediately  
169 adjacent suburbs. In particular, the southernmost neighborhoods of Seattle and the suburbs of Renton, Newcastle,  
170 and Mercer Island had the highest accessibility scores. This is likely due to the confluence of multiple interstate  
171 highways (I-5, I-90, and I-405) in this area which decrease the estimated travel times to vaccination sites.  
172 While the relative patterns of vaccine accessibility are similar between the two age groups, the magnitude was found  
173 to be significantly different, with most tracts having school age accessibility scores that were 1/3<sup>rd</sup> to 1/4<sup>th</sup> of the  
174 adolescent score. This reflects the lower number of vaccination sites providing school age vaccines. Similarly,  
175 vaccine coverage was shown to have the same relative patterns between the two age groups, but there was a mean  
176 difference of -21.5% between adolescents and school age children coverage rates. Unfortunately, this is in line with  
177 the US national trends on pediatric vaccination. By the end of August 2022, 60.4% of US adolescents had completed  
178 the primary COVID-19 vaccination series while only 30.5% of school age children had.<sup>21</sup> This likely in part reflects  
179 the differences in eligibility and authorization timeline between the two age groups, with the vaccine for 12 to 15-  
180 year-olds authorized on 5/10/2021 in the United States, while the vaccine for 5 to 11-year-olds were authorized on  
181 10/29/2021. Furthermore, the dosage differences for the school age group from the adolescent/adult vaccine may  
182 have required vaccination sites to develop different vaccine storage protocols and have additional staffing  
183 requirements to meet the additional demand.

184           Given that pediatric COVID-19 vaccination lagged compared to adult coverage, it was important to identify  
185 significant predictors of vaccination coverage. The most notable difference between the school age and adolescent  
186 groups is that vaccine access was not associated with coverage in school age children in any of the multivariate  
187 analyses, while it was associated for adolescents after adjusting for an interaction term with our measure for  
188 neighborhood educational attainment (percentage of adults with bachelor's or higher degrees). Interestingly, the  
189 relationship between accessibility and coverage appears to be limited to ZCTA with lower levels of educational  
190 attainment based on the stratified analysis in Table 4. In both age groups, average educational attainment was the  
191 single strongest positive predictor of both coverage rates and accessibility scores at the ZCTA level. There is  
192 evidence showing that higher levels of educational attainment have been associated with higher interest in COVID-  
193 19 vaccination in several survey studies in the United States and several other countries.<sup>22-25</sup> One hypothesis to  
194 explain why accessibility is a less important predictor in neighborhoods with higher levels of educational attainment  
195 may be that caretakers who have higher levels of educational attainment may have a greater surplus of time and  
196 more flexible work schedules to take their children to be vaccinated. Therefore, their likelihood to be vaccinated  
197 could be less dependent on the spatial accessibility of vaccination sites. Alternatively, accessibility was correlated  
198 with educational attainment for both age groups. It may be that there is a specific threshold of spatial accessibility  
199 that is necessary for high rates of vaccination coverage, and the likelihood that a ZCTA has sufficient accessibility is  
200 better predicted by educational attainment. Accessibility beyond that level has diminishing returns, and therefore  
201 results in a statistically non-significant relationship in our models.

202           Racial disparities in COVID-19 outcomes and vaccination have been a major health equity concern  
203 throughout this pandemic. One previous study looking at COVID-19 vaccination coverage in Texas found that  
204 ZCTAs with higher than the median percentage of Black, Hispanic, and American Indian/Alaska Native residents  
205 had significantly lower rates of vaccine coverage.<sup>26</sup> Our analysis found that the percentage of AI/AN residents was  
206 associated with lower rates of school age vaccine coverage in the multivariate model without interactions, but this  
207 relationship was non-significant in the model with interactions. Meanwhile, the percent Asian, Hispanic, and NH/PI  
208 residents were all associated with higher levels of vaccine coverage. It is important to highlight that this is an  
209 ecological study, and therefore the analysis occurs at the level of ZCTAs rather than individuals. Therefore, the  
210 relationships found for racial composition should not be interpreted as equivalent relationships for individuals of that  
211 particular race, as this interpretation would represent an ecological fallacy. Instead, the goal of including racial

212 composition variables was to look for possible effects of structural racism and segregation. To illustrate this point,  
213 the ecological relationships between race/ethnicity composition of a ZCTA and vaccine coverage shown here differ  
214 from published individual-level data on race and vaccination by PHSKC on their COVID-19 vaccination  
215 dashboard.<sup>12</sup> Vaccine coverage among AI/AN individuals across all ages (including adults) in King County was >  
216 95% in July 2022, while Hispanic and Black individuals had lower rates of coverage at 70.1% and 76.7%  
217 respectively. This difference with our ZCTA level results highlights the difference between ecological and  
218 individual relationships. It is also important to call out the potential effect of measurements with small numbers with  
219 limited variability. Within ZCTAs, AI/AN and NH/PI percentage was low across the region with the mean  
220 percentage less than 1%, so these variables' relationships are at higher risk for bias from influential observations.  
221 For Hispanic percentage, the true relationship is difficult to determine given the inconsistent estimated effects  
222 between the multivariable and univariable models. Percentage of household poverty was also negatively associated  
223 with school age vaccination rates which is consistent with previous work looking at vaccination coverage and  
224 healthcare utilization during the pandemic.<sup>8,26</sup>

225         This study does have several important limitations. This is a cross-sectional analysis which limits us from  
226 establishing any causal inferences. As with any spatial analyses, the modifiable areal unit problem may affect our  
227 ability to properly identify relationships.<sup>27</sup> Spatial relationships can be biased by how administrative units such as  
228 ZCTAs are drawn, because the boundaries affect the aggregation of data. ZCTAs were the only sub-county level of  
229 data we were able to access for vaccine coverage. We also limited our study to vaccination sites within King County  
230 due to our access of vaccine coverage data, and we did not account for intercounty travel in calculating accessibility.  
231 Another limitation is that our measures of vaccine accessibility are estimates based on assumptions of travel and  
232 healthcare utilization behaviors. We have formulated them using existing street network data, publicly available  
233 vaccine site data, and existing literature and data on healthcare travel behaviors. The severe disruptions of the  
234 COVID-19 pandemic to day-to-day travel and the staggered nature of vaccine rollouts make it difficult to predict the  
235 lived experience of the individuals living in these neighborhoods when accessing the vaccine. Finally, we were not  
236 able to account for the effects of the mobile and school vaccination sites, tribal sites, and community vaccine drives  
237 that were utilized by King County to help provide the vaccine.<sup>28</sup> These vaccine drives outside of traditional clinics  
238 and pharmacies were an important tool used by PHSKC, other health agencies, and community leaders to help  
239 expand coverage to specific communities, especially for communities that have been historically underserved.<sup>29,30</sup>



240           Despite these limitations, we believe this analysis can be useful in evaluating pediatric COVID-19  
241 vaccination access to help guide public health activities to improve rates of the pediatric population who are up to  
242 date with recommended COVID-19 vaccinations. Vaccine access and coverage for the school age population was  
243 significantly lower than for adolescents. More vaccination sites are needed to provide doses across the full age range  
244 of pediatric patients. Furthermore, there should be targeted efforts in neighborhoods with lower levels of educational  
245 attainment and higher rates of household poverty to increase vaccine coverage in these ZIP codes. These also may  
246 be areas that would benefit the most from future mobile vaccination sites as they had the lowest accessibility scores  
247 as well. This study evaluated several publicly available community-level predictors of vaccine access and coverage.  
248 However, this cannot substitute for a nuanced community-driven understanding of vaccine perception and barriers to  
249 access. It is important for researchers, healthcare providers, public health organizations, and health systems to  
250 partner with local communities to ensure high and equitable coverage of vaccines. Ultimately, increasing COVID-19  
251 vaccination rates and re-vaccinating with updated formulations among children remains an important priority for  
252 pediatric healthcare providers and public health workers to help prevent future waves and outbreaks.

253

254 **Acknowledgments:**

255 We would like to thank Daniel Casey and Sargis Pogojan from PHSKC for discussions providing background  
256 regarding King County's COVID-19 vaccination effort and for reviewing this manuscript prior to submission.

257 **Role of the funding source:**

258 There was no specific funding source involved in the design, analysis, or writing of this paper.

259 **Declarations of Interest:**

260 We declare no competing interests.

261 **Data Sharing:**

262 Current vaccine locations can be found using the Vaccinate WA website at:

263 <https://vaccinelocator.doh.wa.gov/?language=en> and updated vaccine coverage data can be found using the Public

264 Health Seattle & King County website at: [https://kingcounty.gov/en/legacy/depts/health/covid-](https://kingcounty.gov/en/legacy/depts/health/covid-19/data/vaccination.aspx)

265 [19/data/vaccination.aspx](https://kingcounty.gov/en/legacy/depts/health/covid-19/data/vaccination.aspx). These websites do not archive previous data. The specific datasets used in the analysis can

266 be found in our code repository at [repository link to be added at time of resubmission]

267

268

269 **Tables**

270

|                                                                             | Mean  | SD   |
|-----------------------------------------------------------------------------|-------|------|
| <b>Population Covariates</b>                                                |       |      |
| % American Indian/Alaska Native Residents                                   | 0.4   | 0.6  |
| % Asian Residents                                                           | 16.6  | 10.5 |
| % Black Residents                                                           | 5.7   | 6.1  |
| % Hispanic Residents                                                        | 10.3  | 8.3  |
| % Native Hawaiian/Pacific Islander Residents                                | 0.7   | 1.2  |
| % Households below the Poverty Line                                         | 4.9   | 3.6  |
| % Adults with Bachelor's Degree or Higher                                   | 51.6  | 20.4 |
| % Households with No Personal Automobiles                                   | 10.1  | 10.8 |
| <b>Vaccine Accessibility (accessible sites per 100,000 children)</b>        |       |      |
| Adolescent (12-17 years)                                                    | 122.9 | 34.2 |
| School Age (5-11 years)                                                     | 35.7  | 11.7 |
| <b>Vaccine Coverage (percent of children with primary series completed)</b> |       |      |
| Adolescent                                                                  | 75.8  | 17.0 |
| School Age                                                                  | 54.4  | 20.6 |

271

272

273

Table 1: Descriptive statistics of King County ZCTAs

|                                              | School Age Accessibility |                   | Adolescent Accessibility |                   |
|----------------------------------------------|--------------------------|-------------------|--------------------------|-------------------|
|                                              | Coeff                    | p-Value           | Coeff                    | p-Value           |
| % American Indian/Alaska Native Residents    | 0.719                    | 0.550             | 4.481                    | 0.289             |
| % Asian Residents                            | <b>0.218</b>             | <b>0.076</b>      | <b>0.735</b>             | <b>0.007</b>      |
| % Black Residents                            | 0.071                    | 0.707             | 0.649                    | 0.320             |
| % Hispanic Residents                         | 0.133                    | 0.161             | 0.584                    | 0.085             |
| % Native Hawaiian/Pacific Islander Residents | 0.524                    | 0.477             | 1.236                    | 0.633             |
| % Households Below Poverty Line              | -0.186                   | 0.252             | -0.538                   | 0.361             |
| % Adults with Bachelor's or Higher Degree    | <b>0.158</b>             | <b>0.010</b>      | <b>0.825</b>             | <b>&lt; 0.001</b> |
| Lambda                                       | <b>0.897</b>             | <b>&lt; 0.001</b> | <b>0.818</b>             | <b>&lt; 0.001</b> |
| AIC                                          | 504.6                    | -                 | 699.0                    | -                 |

274

275

276

277

Table 2: Regression models of vaccine accessibility. Lambda is spatial autoregressive coefficient in spatial error term. Terms with significance at  $p < 0.05$  are bolded.

278  
279

| Adolescent Vaccination Coverage              | Univariate               |                   | Multivariate  |                   | Multivariate with Interaction |                   |
|----------------------------------------------|--------------------------|-------------------|---------------|-------------------|-------------------------------|-------------------|
|                                              | Coeff                    | p-Value           | Coeff         | p-Value           | Coeff                         | p-Value           |
| Vaccine Access                               | <b>0.231</b>             | <b>0.005</b>      | -0.061        | 0.261             | <b>0.385</b>                  | <b>0.013</b>      |
| % American Indian/Alaska Native Residents    | <b>-7.365</b>            | <b>0.036</b>      | -2.523        | 0.251             | -0.715                        | 0.735             |
| % Asian Residents                            | <b>0.592</b>             | <b>0.003</b>      | <b>0.351</b>  | <b>0.011</b>      | <b>0.283</b>                  | <b>0.026</b>      |
| % Black Residents                            | -0.302                   | 0.342             | 0.394         | 0.176             | 0.058                         | 0.842             |
| % Hispanic Residents                         | -0.754                   | 0.057             | <b>1.042</b>  | <b>0.003</b>      | <b>0.823</b>                  | <b>0.016</b>      |
| % Native Hawaiian/Pacific Islander Residents | 2.073                    | 0.296             | <b>4.175</b>  | <b>&lt; 0.001</b> | <b>4.777</b>                  | <b>&lt; 0.001</b> |
| % Households Below Poverty Line              | <b>-1.228</b>            | <b>0.032</b>      | -0.816        | 0.118             | -0.656                        | 0.186             |
| % Adults with Bachelor's Degree or Higher    | <b>0.629</b>             | <b>&lt; 0.001</b> | <b>0.935</b>  | <b>&lt; 0.001</b> | <b>1.896</b>                  | <b>&lt; 0.001</b> |
| Access-Bachelor's Degree Interaction Term    | -                        | -                 | -             | -                 | <b>-0.007</b>                 | <b>0.002</b>      |
| Lambda                                       | <b>0.556<sup>†</sup></b> | <b>&lt; 0.001</b> | -0.134        | 0.466             | -0.217                        | 0.240             |
| AIC                                          | 620.9 <sup>†</sup>       | -                 | 578.97        | -                 | 572.4                         | -                 |
| School Age Vaccination Coverage              | Univariate               |                   | Multivariate  |                   | Multivariate with Interaction |                   |
|                                              | Coeff                    | p-Value           | Coeff         | p-Value           | Coeff                         | p-Value           |
| Vaccine Access                               | <b>0.686</b>             | <b>0.006</b>      | 0.074         | 0.670             | 0.505                         | 0.234             |
| % American Indian/Alaska Native Residents    | <b>-6.541</b>            | <b>0.029</b>      | <b>-4.106</b> | <b>0.039</b>      | -3.546                        | 0.079             |
| % Asian Residents                            | <b>0.485</b>             | <b>0.006</b>      | <b>0.412</b>  | <b>0.002</b>      | <b>0.370</b>                  | <b>0.006</b>      |
| % Black Residents                            | -0.460                   | 0.278             | 0.222         | 0.457             | 0.215                         | 0.467             |
| % Hispanic Residents                         | <b>-0.719</b>            | <b>0.039</b>      | <b>0.652</b>  | <b>0.013</b>      | <b>0.611</b>                  | <b>0.022</b>      |
| % Native Hawaiian/Pacific Islander Residents | -2.571                   | 0.142             | -0.733        | 0.537             | -0.873                        | 0.463             |
| % Households Below Poverty Line              | <b>-1.601</b>            | <b>&lt; 0.001</b> | <b>-1.145</b> | <b>0.002</b>      | <b>-1.158</b>                 | <b>0.001</b>      |
| % Adults with Bachelor's Degree or Higher    | <b>0.909</b>             | <b>&lt; 0.001</b> | <b>0.811</b>  | <b>&lt; 0.001</b> | <b>1.127</b>                  | <b>&lt; 0.001</b> |
| Access-Bachelor's Degree Interaction Term    | -                        | -                 | -             | -                 | -0.009                        | 0.260             |
| Lambda                                       | <b>0.845<sup>†</sup></b> | <b>&lt; 0.001</b> | <b>0.781</b>  | <b>&lt; 0.001</b> | <b>0.752</b>                  | <b>&lt; 0.001</b> |
| AIC                                          | 600.0 <sup>†</sup>       | -                 | 546.0         | -                 | 546.8                         | -                 |

280  
281  
282  
283

Table 3: Regression models of vaccine coverage. Lambda is spatial autoregressive coefficient in spatial error term. Terms with significance at  $p < 0.05$  are bolded. <sup>†</sup> Univariate Lambda and AIC is for the Vaccine Access models

284

|                                         | Coverage in ZCTAs with $\geq 50\%$ Bachelor's degrees among adults (n = 41 ZCTAs) |         | Coverage in ZCTAs with $< 50\%$ Bachelor's degrees among adults (n = 33 ZCTAs) |              |
|-----------------------------------------|-----------------------------------------------------------------------------------|---------|--------------------------------------------------------------------------------|--------------|
|                                         | Coeff                                                                             | p-Value | Coeff                                                                          | p-Value      |
| <b>Adolescent Vaccine Accessibility</b> | 0.056                                                                             | 0.341   | <b>0.239</b>                                                                   | <b>0.001</b> |
| <b>School Age Vaccine Accessibility</b> | 0.502                                                                             | 0.096   | 0.183                                                                          | 0.356        |

285

286

287

288

289

Table 4: Stratified spatial regression analysis of the relationship between vaccine accessibility and coverage, stratifying on age group and the educational attainment of the ZCTAs. No other covariates were included in these analyses. Terms with significance at  $p < 0.05$  are bolded.

290 **Figures**

**Vaccination Sites - Adolescent**

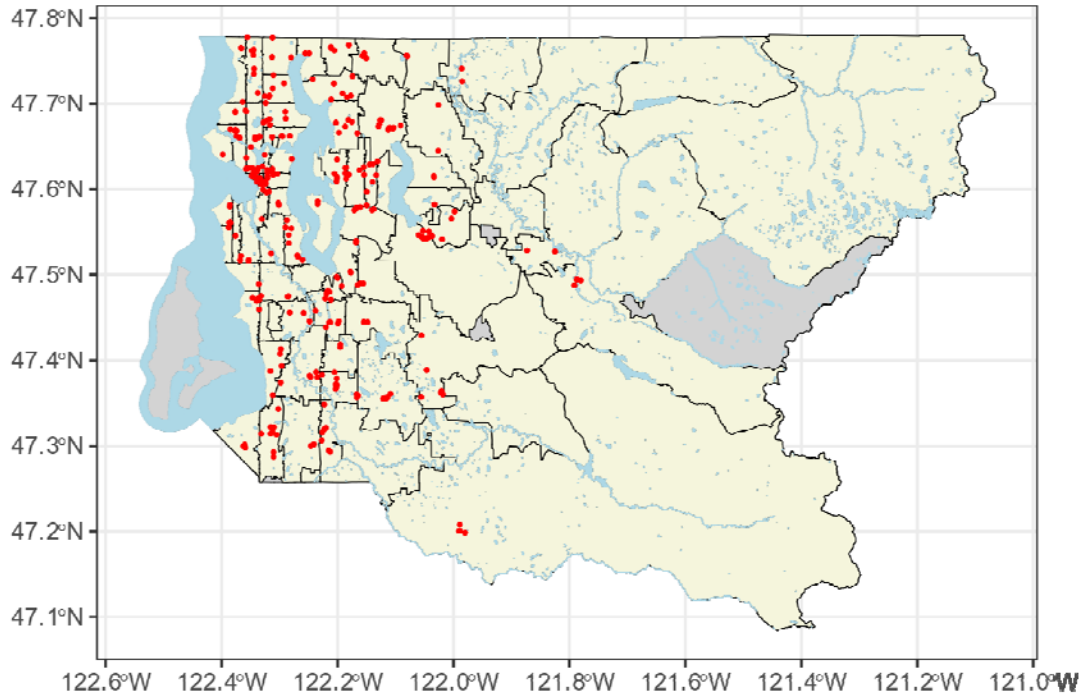

**Vaccination Sites - School Age**

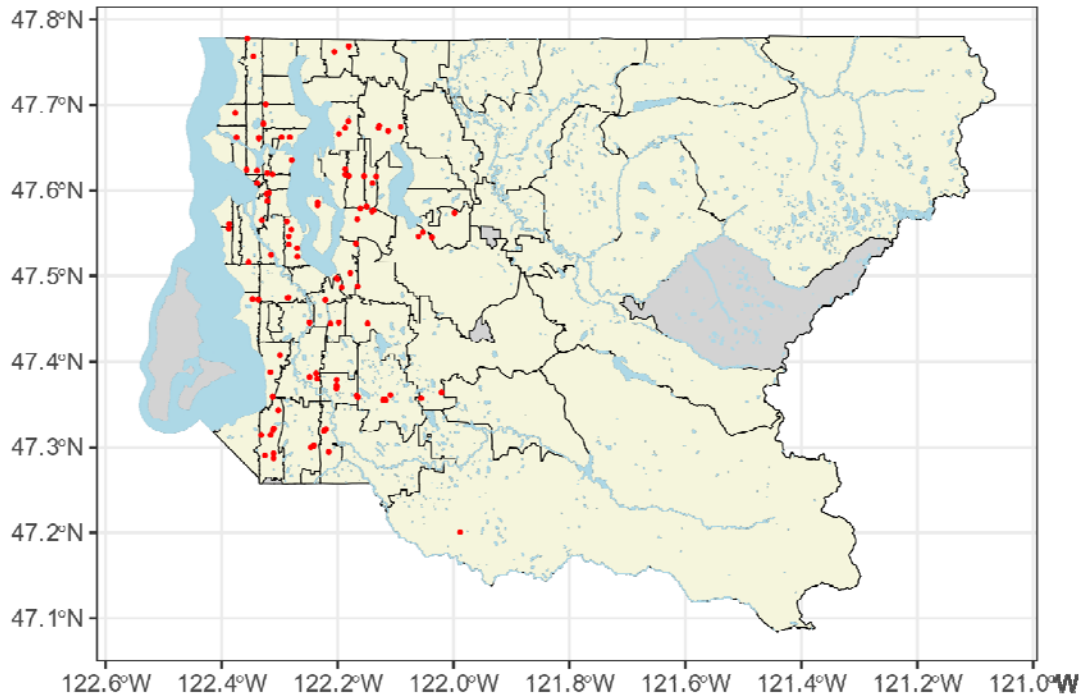

291  
292  
293  
294  
295

Figure 1: Vaccination sites within King County separated by age. Each red dot represents one site. Black lines indicate ZCTA boundaries. Gray ZCTAs were not included in the analysis.

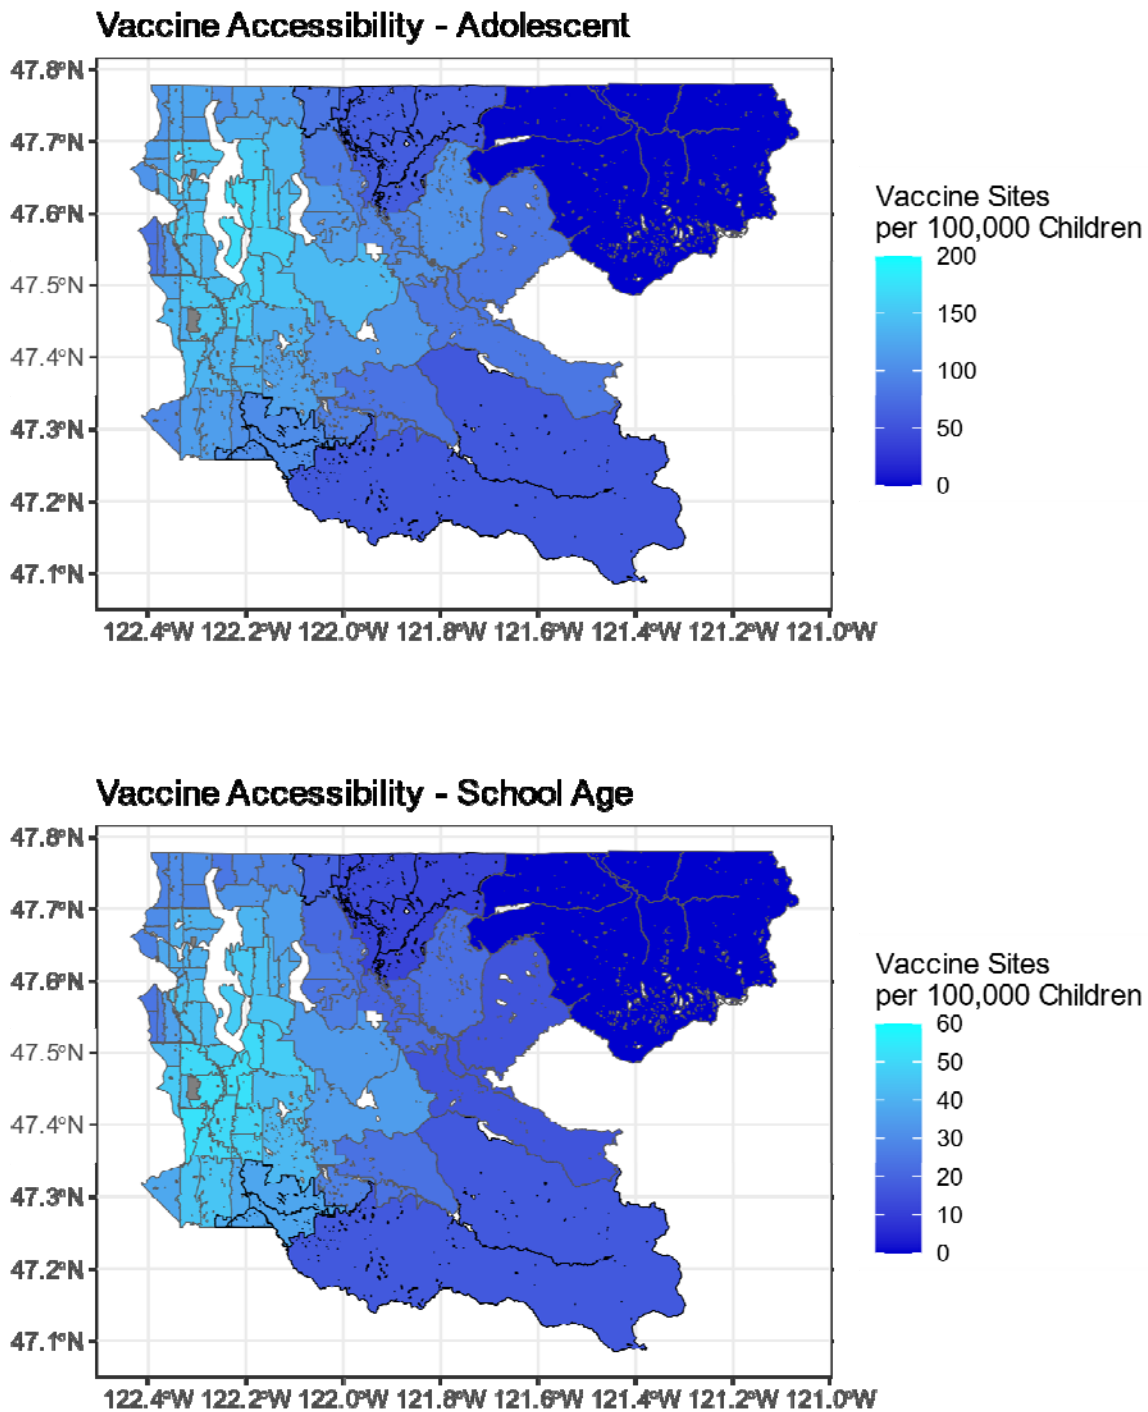

296  
297  
298  
299  
300  
301

Figure 2: Vaccine accessibility by ZCTA in King County. Note significantly different scale magnitudes (maximum score of 200 for adolescents vs 60 for school aged children) in order to better compare the trends across maps. Gray ZCTAs were excluded due to zero population (University of Washington Main Campus Buildings and Seattle-Tacoma International Airport)

### Vaccine Coverage - Adolescent

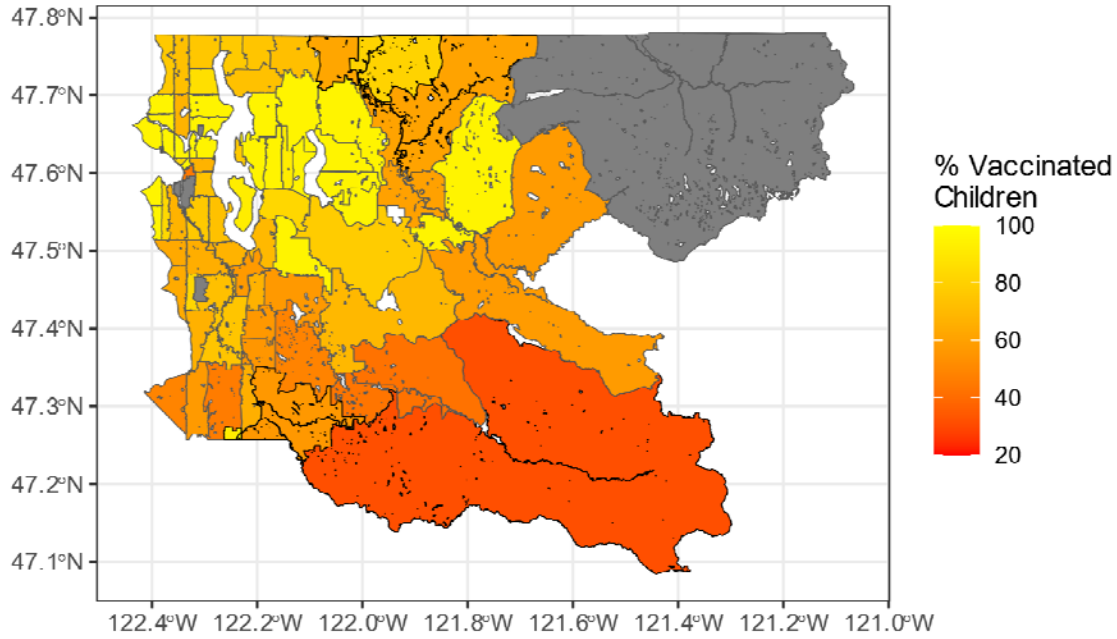

### Vaccine Coverage - School Age

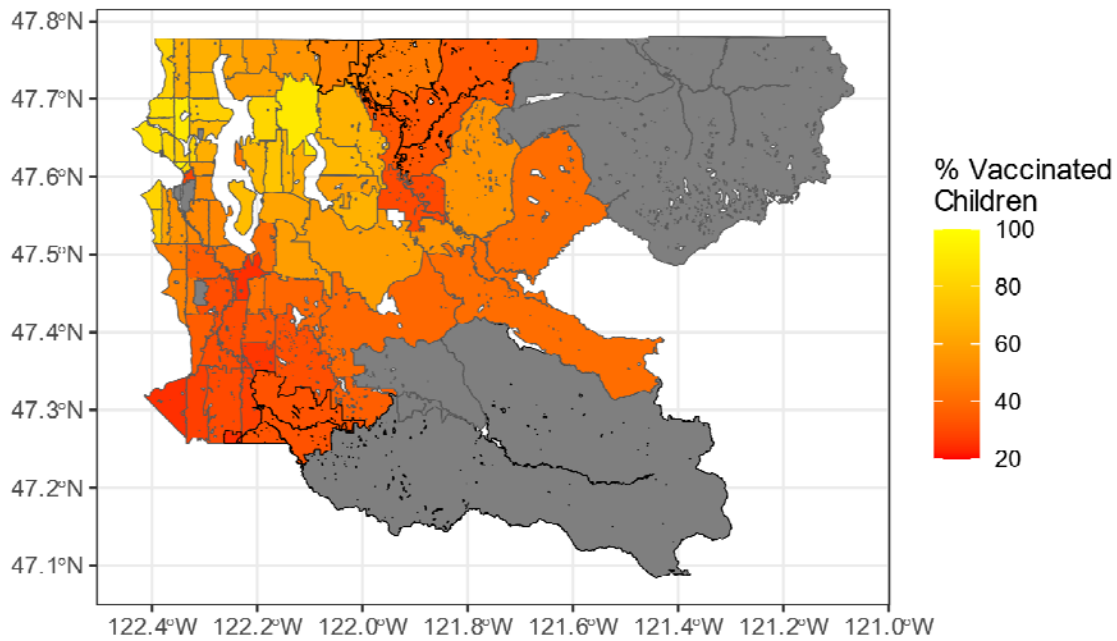

302  
303  
304  
305  
306  
307

Figure 3: Vaccine coverage by ZCTA in King County. Gray ZCTAs were censored due to less than 10 residents of the age group.

## 308 Works Cited

- 309 1. Mudd AE, Michael YL, Melly S, Moore K, Diez-Roux A, Forrest CB. Spatial accessibility to pediatric primary  
310 care in Philadelphia: an area-level cross sectional analysis. *Int J Equity Health*. 2019;18(1):76.  
311 doi:10.1186/s12939-019-0962-x
- 312 2. Neuner JM, Zhou Y, Fergestrom N, et al. Pharmacy deserts and patients with breast cancer receipt of influenza  
313 vaccines. *J Am Pharm Assoc*. 2021;61(6):e25-e31. doi:10.1016/j.japh.2021.07.006
- 314 3. Chung PC, Chan TC. Association between local spatial accessibility of dental care services and dental care  
315 quality. *BMC Oral Health*. 2021;21(1):582. doi:10.1186/s12903-021-01943-z
- 316 4. Cervigni F, Suzuki Y, Ishii T, Hata A. Spatial Accessibility to Pediatric Services. *J Community Health*.  
317 2008;33(6):444-448. doi:10.1007/s10900-008-9112-x
- 318 5. Fu LY, Cowan N, McLaren R, Engstrom R, Teach SJ. Spatial Accessibility to Providers and Vaccination  
319 Compliance Among Children With Medicaid. *Pediatrics*. 2009;124(6):1579-1586. doi:10.1542/peds.2009-0233
- 320 6. White AA, Neelon B, Martin RH, et al. Spatial patterns of HPV and Tdap vaccine dose administration and the  
321 association of health department clinic access in Georgia counties. *Vaccine*. 2022;40(9):1352-1360.  
322 doi:10.1016/j.vaccine.2021.12.039
- 323 7. Radhakrishnan L, Carey K, Hartnett KP, et al. Pediatric Emergency Department Visits Before and During the  
324 COVID-19 Pandemic — United States, January 2019–January 2022. *MMWR Morb Mortal Wkly Rep*.  
325 2022;71(8):313-318. doi:10.15585/mmwr.mm7108e1
- 326 8. Fritz CQ, Fleegler EW, DeSouza H, et al. Child Opportunity Index and Changes in Pediatric Acute Care  
327 Utilization in the COVID-19 Pandemic. *Pediatrics*. 2022;149(5):e2021053706. doi:10.1542/peds.2021-053706
- 328 9. DeSilva MB, Haapala J, Vazquez-Benitez G, et al. Association of the COVID-19 Pandemic With Routine  
329 Childhood Vaccination Rates and Proportion Up to Date With Vaccinations Across 8 US Health Systems in the  
330 Vaccine Safety Datalink. *JAMA Pediatr*. 2022;176(1):68. doi:10.1001/jamapediatrics.2021.4251
- 331 10. Walker K, Herman M, Eberwein K. tidycensus. Published online June 3, 2022. [https://cran.r-](https://cran.r-project.org/web/packages/tidycensus/index.html)  
332 [project.org/web/packages/tidycensus/index.html](https://cran.r-project.org/web/packages/tidycensus/index.html)
- 333 11. US Census Bureau. 2019 American Community Survey Estimates 5-Year. Census Bureau Data. Published  
334 2019. <https://data.census.gov/cedsci/>
- 335 12. Public Health - Seattle and King County. Summary of COVID-19 vaccination among residents - King County.  
336 Accessed September 7, 2022. <https://kingcounty.gov/depts/health/covid-19/data/vaccination.aspx>
- 337 13. Luo W, Qi Y. An enhanced two-step floating catchment area (E2SFCA) method for measuring spatial  
338 accessibility to primary care physicians. *Health Place*. 2009;15(4):1100-1107.  
339 doi:10.1016/j.healthplace.2009.06.002
- 340 14. Population Density. WorldPop. Published 2022. Accessed July 26, 2022.  
341 <https://hub.worldpop.org/geodata/listing?id=76>
- 342 15. Rafael H. M. Pereira, Marcus Saraiva, Daniel Herszenhut, Carlos Kaue Vieira Braga, Matthew Wigginton  
343 Conway. r5r: Rapid Realistic Routing on Multimodal Transport Networks with R5 in R. *Findings*. Published  
344 online 2021. doi:10.32866/001c.21262
- 345 16. Bivand R, Millo G, Piras G. A Review of Software for Spatial Econometrics in R. *Mathematics*. 2021;9(11).  
346 doi:10.3390/math9111276



- 347 17. Bivand R, Piras G. *spatiareg: Spatial Regression Analysis*. Published online August 16, 2022. [https://cran.r-](https://cran.r-project.org/web/packages/spatialreg/index.html)  
348 [project.org/web/packages/spatialreg/index.html](https://cran.r-project.org/web/packages/spatialreg/index.html)
- 349 18. Qi F, Barragan D, Rodriguez MG, Lu J. Evaluating spatial accessibility to COVID-19 vaccine resources in  
350 diversely populated counties in the United States. *Front Public Health*. 2022;10:895538.  
351 doi:10.3389/fpubh.2022.895538
- 352 19. Liu D, Kwan MP, Kan Z, Song Y, Li X. Racial/Ethnic Inequity in Transit-Based Spatial Accessibility to  
353 COVID-19 Vaccination Sites. *J Racial Ethn Health Disparities*. Published online June 9, 2022.  
354 doi:10.1007/s40615-022-01339-x
- 355 20. Mohammadi A, Mollalo A, Bergquist R, Kiani B. Measuring COVID-19 vaccination coverage: an enhanced  
356 age-adjusted two-step floating catchment area model. *Infect Dis Poverty*. 2021;10(1):118. doi:10.1186/s40249-  
357 021-00904-6
- 358 21. CDC. COVID Data Tracker. Centers for Disease Control and Prevention. Published March 28, 2020. Accessed  
359 August 31, 2022. <https://covid.cdc.gov/covid-data-tracker>
- 360 22. Latkin C, Dayton LA, Yi G, et al. COVID-19 vaccine intentions in the United States, a social-ecological  
361 framework. *Vaccine*. 2021;39(16):2288-2294. doi:10.1016/j.vaccine.2021.02.058
- 362 23. Piltch-Loeb R, Silver DR, Kim Y, Norris H, McNeill E, Abramson DM. Determinants of the COVID-19  
363 vaccine hesitancy spectrum. Rosenbaum JE, ed. *PLOS ONE*. 2022;17(6):e0267734.  
364 doi:10.1371/journal.pone.0267734
- 365 24. Coulaud P julien, Ablona A, Bolduc N, et al. COVID-19 vaccine intention among young adults: Comparative  
366 results from a cross-sectional study in Canada and France. *Vaccine*. 2022;40(16):2442-2456.  
367 doi:10.1016/j.vaccine.2022.02.085
- 368 25. Machida M, Nakamura I, Kojima T, et al. Acceptance of a COVID-19 Vaccine in Japan during the COVID-19  
369 Pandemic. *Vaccines*. 2021;9(3):210. doi:10.3390/vaccines9030210
- 370 26. Mofleh D, Almohamad M, Osaghae I, et al. Spatial Patterns of COVID-19 Vaccination Coverage by Social  
371 Vulnerability Index and Designated COVID-19 Vaccine Sites in Texas. *Vaccines*. 2022;10(4):574.  
372 doi:10.3390/vaccines10040574
- 373 27. Openshaw S. The Modifiable Areal Unit Problem. In: *Concepts and Techniques in Modern Geography*.  
374 Geobooks; 1984. <http://ci.nii.ac.jp/naid/10024464407/en/>
- 375 28. Here's how you can get your 5- to 11-year-old vaccinated against COVID-19 in western Washington.  
376 king5.com. Published November 1, 2021. Accessed January 4, 2023.  
377 [https://www.king5.com/article/news/local/children-vaccine-covid-pediatric/281-a60edba1-9d40-42a6-be16-](https://www.king5.com/article/news/local/children-vaccine-covid-pediatric/281-a60edba1-9d40-42a6-be16-1431e47ef614)  
378 [1431e47ef614](https://www.king5.com/article/news/local/children-vaccine-covid-pediatric/281-a60edba1-9d40-42a6-be16-1431e47ef614)
- 379 29. Hellmann, Melissa. How a Native American COVID-19 vaccine rollout is a model for community-centered  
380 approaches. *The Seattle Times*. [https://www.seattletimes.com/seattle-news/health/we-take-it-for-our-](https://www.seattletimes.com/seattle-news/health/we-take-it-for-our-community-how-a-native-american-survey-and-vaccine-rollout-models-a-community-centered-approach/)  
381 [community-how-a-native-american-survey-and-vaccine-rollout-models-a-community-centered-approach/](https://www.seattletimes.com/seattle-news/health/we-take-it-for-our-community-how-a-native-american-survey-and-vaccine-rollout-models-a-community-centered-approach/).  
382 Published February 1, 2021. Accessed August 28, 2023.
- 383 30. Fairlie T, Chu B, Thomas ES, et al. School-Based Interventions to Increase Student COVID-19 Vaccination  
384 Coverage in Public School Populations with Low Coverage — Seattle, Washington, December 2021–June  
385 2022. *MMWR Morb Mortal Wkly Rep*. 2023;72(11):283-287. doi:10.15585/mmwr.mm7211a3

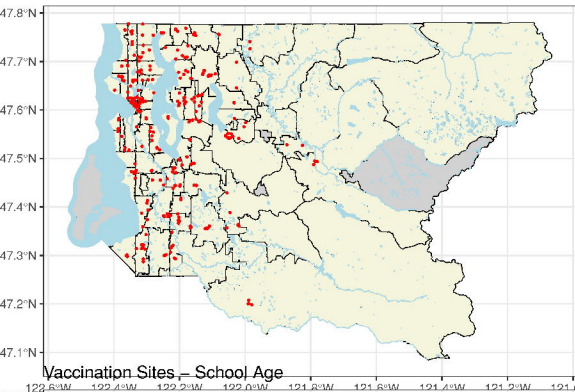

Vaccination Sites - School Age

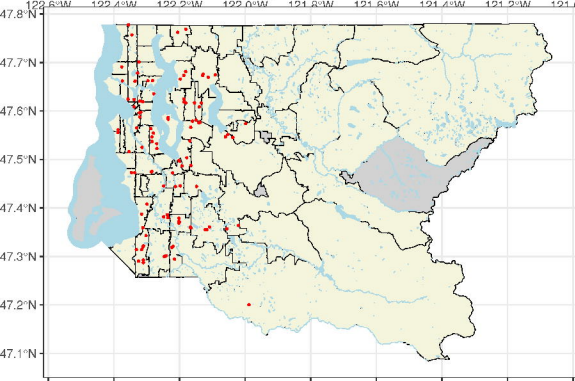

### Vaccine Accessibility – Adolescent

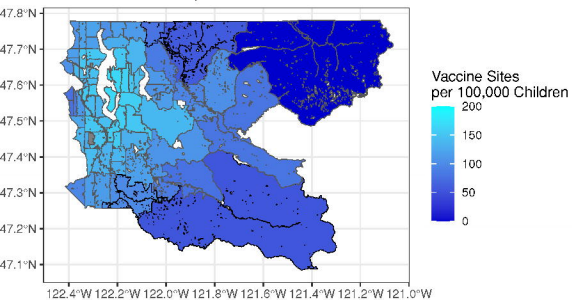

### Vaccine Accessibility – School Age

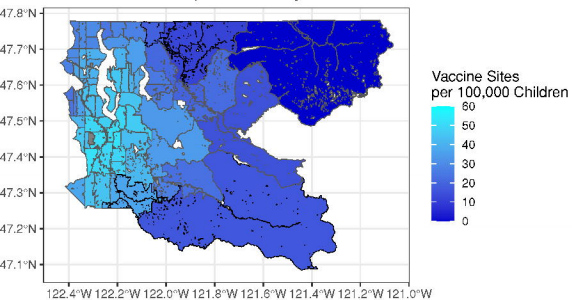

### Vaccine Coverage – Adolescent

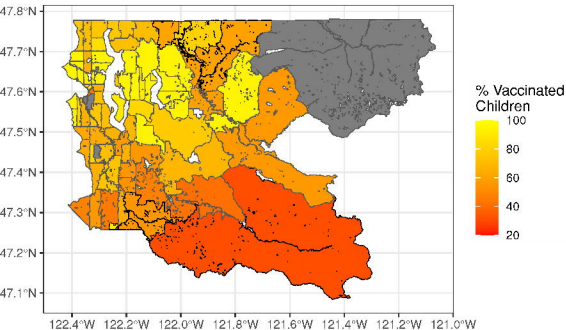

### Vaccine Coverage – School Age

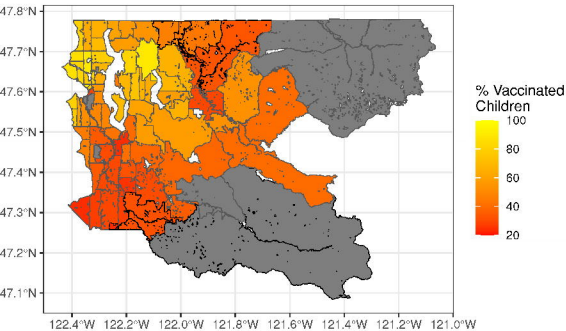

Source: https://medrxiv.org/content/10.1101/2023.12.27.23300589v1.full.pdf
